# Supplementary material for: Density, Excess Molar Volume and Vapor–Liquid Equilibrium Measurements at 101.3 kPa for Binary Mixtures Containing Ethyl Acetate and a Branched Alkane: Experimental Data and Modeling
Source: MDPI journal article supplement (doi:10.3390/liquids3020014), 2023-04-11
Supplement: s1 [file s1]

# Density, Excess Molar Volume and Vapor–Liquid Equilibrium Measurements at 101.3 kPa for Binary Mixtures Containing Ethyl Acetate and a Branched Alkane: Experimental Data and Modeling

 Vincent Caqueret <sup>1,2</sup>, Kaoutar Berkalou <sup>1,2</sup>, Jean-Louis Havet <sup>1,2</sup>, Marie Debacq <sup>1,2</sup>, and Stéphane Vitu <sup>1,2,\*</sup>
<sup>1</sup> CNAM, 2 rue Conté, 75003 Paris – France

<sup>2</sup> Université Paris-Saclay, INRAE, AgroParisTech, UMR SayFood, 91120 Palaiseau – France

\* Correspondence: stephane.vitu@lecnam.net

**Table S1.** Comparison of the density at  $T = 293.15$  K and  $303.15$  K and  $P = 101$  kPa,  $\rho$ , of the pure components with literature values. <sup>a</sup>

| Compound           | $\rho^{293.15\text{ K}} / \text{g}\cdot\text{cm}^{-3}$ |             | $\rho^{303.15\text{ K}} / \text{g}\cdot\text{cm}^{-3}$ |             |
|--------------------|--------------------------------------------------------|-------------|--------------------------------------------------------|-------------|
|                    | This work                                              | Literature  | This work                                              | Literature  |
| ethyl acetate (EA) | 0.90049                                                | 0.9005 [1]  | 0.88829                                                | 0.8882 [1]  |
|                    |                                                        | 0.90057 [2] |                                                        | 0.88835 [2] |
| 3-methylpentane    | 0.66427                                                | 0.66428 [3] | 0.65511                                                | 0.65507 [3] |
|                    |                                                        | 0.66443 [4] |                                                        | 0.65555 [4] |
| 2,3-dimethylbutane | 0.66209                                                | 0.66158 [1] | 0.65286                                                | 0.65231 [1] |
|                    |                                                        | 0.66181 [5] |                                                        | 0.65232 [5] |

<sup>a</sup> Standard uncertainties  $u$  are  $u(\rho) = 0.00005$   $\text{g}\cdot\text{cm}^{-3}$ ,  $u(T_{\rho\text{ meas}}) = 0.03$  K,  $u(P_{\rho\text{ meas}}) = 3$  kPa

**Table S2.** Coefficients of the Antoine expression employed in this work. <sup>a</sup>

| Component          | A       | B       | C       |
|--------------------|---------|---------|---------|
| ethyl acetate      | 15.0294 | 3271.98 | 35.8136 |
| hexane             | 14.2616 | 2950.15 | 35.8736 |
| 3-methylpentane    | 14.2177 | 2903.16 | 33.8691 |
| 2,3-dimethylbutane | 14.1575 | 2848.31 | 32.4016 |

<sup>a</sup> The Antoine expression used is  $\ln P_i^{\circ} = A - \frac{B}{T-C}$  with  $P$  in kPa and  $T$  in K.

**Table S3.** Coefficients of the polynomial equation density - composition. <sup>a</sup>

| Binary system                   | A           | B           | C            | D           | E           | F         |
|---------------------------------|-------------|-------------|--------------|-------------|-------------|-----------|
| hexane (1) – EA (2)             | -247.484872 | 1004.480655 | -1637.264321 | 1344.856131 | -562.246451 | 97.335521 |
| 3-methylpentane (1) – EA (2)    | -221.013283 | 906.640955  | -1494.064113 | 1241.322249 | -525.486554 | 92.282052 |
| 2,3-dimethylbutane (1) – EA (2) | -162.214185 | 667.364888  | -1104.679897 | 924.330914  | -396.275100 | 71.162386 |

<sup>a</sup> The polynomial function is  $x_1 = A\rho_m^5 + B\rho_m^4 + C\rho_m^3 + D\rho_m^2 + E\rho_m + F$  with  $x_1$  the mole fraction of component 1 and  $\rho_m$  the density of the mixture at 298.15 K, expressed in  $\text{g}\cdot\text{cm}^{-3}$ .

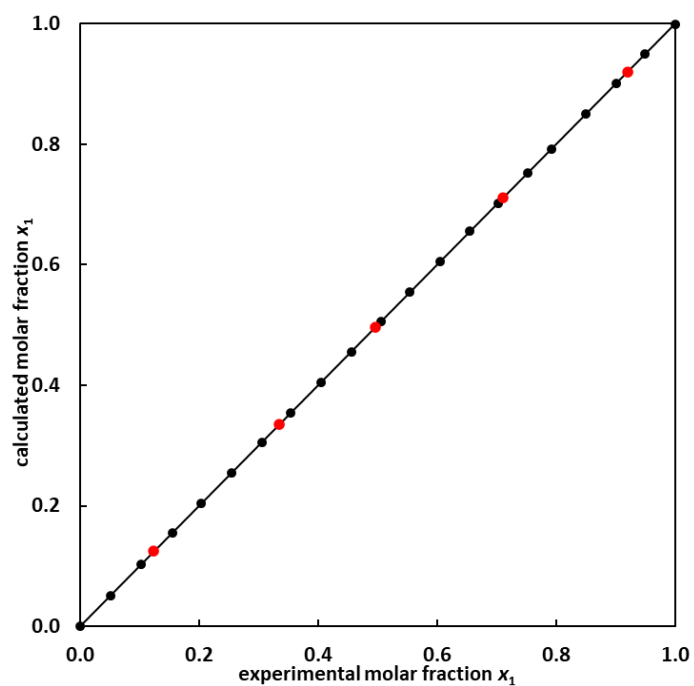

**Figure S1.** Calibration curve analysis of the binary system hexane (1) – ethyl acetate (2). •: experimental points used for the establishment of the calibration curve. •: mixtures of known compositions prepared and measured to check the accuracy of the method and to evaluate the uncertainty of the analysis ( $u(x_1) = 0.001$ ).

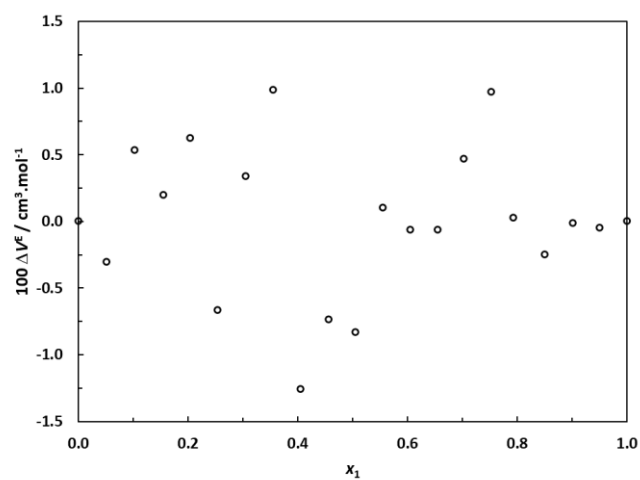

**Figure S2.** Residual distribution plot for the excess molar volume of the binary system hexane (1) – ethyl acetate (2) at 298.15 K resulting from Equation (2) with coefficients given in Table 6.

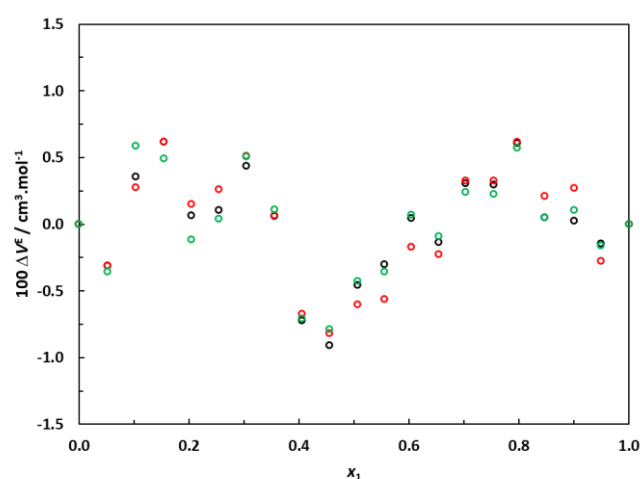

**Figure S3.** Residual distribution plot for the excess molar volume of the binary system 3-methylpentane (1) – ethyl acetate (2) at 293.15 K, 298.15 K and 303.15 K resulting from Equation (2) with coefficients given in Table 6.

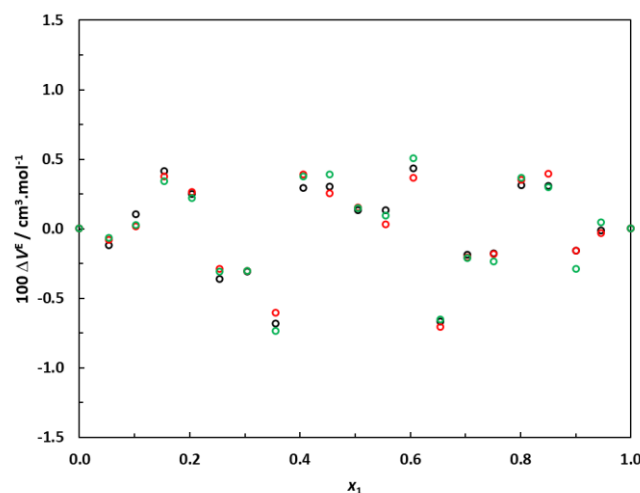

**Figure S4.** Residual distribution plot for the excess molar volume of the binary system 2,3-dimethylbutane (1) – ethyl acetate (2) at 293.15 K, 298.15 K and 303.15 K resulting from Equation (2) with coefficients given in Table 6.

## References

1. Pereiro, A.B.; Rodríguez, A. Phase Equilibria of the Azeotropic Mixture Hexane + Ethyl Acetate with Ionic Liquids at 298.15 K. *J. Chem. Eng. Data* **2008**, *53*, 1360–1366. <https://doi.org/10.1021/je800077r>
2. Malek, N.I.; Singh, A.; Surati, R.; Ijardar, S.P. Study on thermo physical and excess molar properties of binary systems of ionic liquids. I: [Cnmim][PF6] (n = 6, 8) and alkyl acetates. *J. Chem. Thermodyn.* **2014**, *74*, 103–118. <https://doi.org/10.1016/j.jct.2014.01.012>
3. Guerrero, H.; García-Mardones, M.; Pérez-Gregorio, V.; Gascón, I.; Lafuente, C. Experimental and VTPR-predicted volumetric properties of branched hexanes. *Fluid Phase Equilib.* **2013**, *338*, 141–147. <https://doi.org/10.1016/j.fluid.2012.11.013>
4. Awwad, A.M.; Petrick, R.A. Adiabatic compressibility of branched chain hydrocarbons- pentanes and hexanes. *J. mol. Liq.* **1983**, *25*, 115–127. [https://doi.org/10.1016/0167-7322\(83\)80014-2](https://doi.org/10.1016/0167-7322(83)80014-2)
5. Riembauer, M.; Schulte, L.; Wurflinger, A. PVT Data of Liquid and Solid Phases of Methanol, Cyclohexanol, and 2,3-Dimethylbutane up to 300 MPa. *Z. Phys. Chem. (Munich)* **1990**, *166*, 53–61. [https://doi.org/10.1524/zpch.1990.166.Part\\_1.053](https://doi.org/10.1524/zpch.1990.166.Part_1.053)
